# Supplementary material for: Trends in UK meat consumption: analysis of data from years 1–11 (2008–09 to 2018–19) of the National Diet and Nutrition Survey rolling programme
Source: PubMed Central journal article supplement (PMC8515514; doi:10.1016/s2542-5196(21)00228-x), 2021-10-07
Supplement: mmc1.pdf [file mmc1.pdf]

# THE LANCET

## Planetary Health

### Supplementary appendix

This appendix formed part of the original submission and has been peer reviewed. We post it as supplied by the authors.

Supplement to: Stewart C, Piernas C, Cook B, Jebb SA. Trends in UK meat consumption: analysis of data from years 1–11 (2008–09 to 2018–19) of the National Diet and Nutrition Survey rolling programme. *Lancet Planet Health* 2021; **5**: e699–708.

## Appendix – Trends in UK Meat Consumption: Analysis of the National Diet and Nutrition Survey Rolling Programme Years 1-11 (2008/09-2018/19)

**Table 1. Descriptions of individual meat and fish types and summary categories**

| Meat/Fish Item       | Description                                                                                                                                                                                                                                                                                       |
|----------------------|---------------------------------------------------------------------------------------------------------------------------------------------------------------------------------------------------------------------------------------------------------------------------------------------------|
| Beef                 | Any muscle meat from beef or veal                                                                                                                                                                                                                                                                 |
| Lamb                 | Any muscle meat from mutton or lamb                                                                                                                                                                                                                                                               |
| Pork                 | Any muscle meat from pork (not bacon or ham)                                                                                                                                                                                                                                                      |
| Processed red meat   | Manufactured, cured and/or dried meat, including bacon and ham                                                                                                                                                                                                                                    |
| Other red meat       | Any muscle meat from goat or venison                                                                                                                                                                                                                                                              |
| Burgers              | Any meat consumed as a burger (not poultry). Grill steaks                                                                                                                                                                                                                                         |
| Sausages             | Any meat consumed as a sausage                                                                                                                                                                                                                                                                    |
| Offal                | Brain, heart, kidney, tongue, tripe, liver, oxtail, liver pate                                                                                                                                                                                                                                    |
| Poultry (white meat) | Any muscle meat from chicken or turkey                                                                                                                                                                                                                                                            |
| Processed poultry    | Manufactured, cured and/or dried meat, including chicken paste                                                                                                                                                                                                                                    |
| Game birds           | Any muscle meat from duck, goose, partridge, pheasant                                                                                                                                                                                                                                             |
| White fish           | Ayr, catfish, caviar, cod, cod roe, coley, dover sole, flounder, haddock, hake, halibut, hoki, john dory, lemonsole, ling, marlin, monkfish, mullet (red and grey), sake, plaice, pollack, red fish, red snapper, rock salmon/dogfish, rohu, sea bass, sea bream, shark, tilapia, turbot, whiting |
| Oily fish            | Anchovies, bloater, carp trout, eel mackerel, herring, hilsa, kipper, jack fish, pangas, pilchards, salmon (including canned), sardines, sprats, swordfish, tuna (fresh only), whitebait                                                                                                          |
| Canned tuna          | Tuna (canned only)                                                                                                                                                                                                                                                                                |
| Shellfish            | Abalone, clams, cockles, crab, lobster, mussels, octopus, oysters, prawns, scallops, shrimps, squid, whelks, winkles                                                                                                                                                                              |
| Total fish           | White fish, oily fish, canned tuna and shellfish                                                                                                                                                                                                                                                  |
| Total meat           | Total red meat, total white meat and total processed meat                                                                                                                                                                                                                                         |
| Total red meat       | Beef, lamb, pork, other red meat and offal                                                                                                                                                                                                                                                        |
| Total white meat     | Poultry and game birds                                                                                                                                                                                                                                                                            |
| Total processed meat | Processed red meat, burgers, sausages and processed poultry                                                                                                                                                                                                                                       |

All descriptions, with the exception of ‘total processed meat’, were taken from the National Diet and Nutrition Survey data files.

**Table 2. Proportion of respondents who self-identified as vegetarian or vegan within the NDNS Rolling Programme (2008/09-2018/19).**

| <b>Survey Year</b> | <b>Proportion of respondents<br/>N (%)</b> |
|--------------------|--------------------------------------------|
| 2008/09            | 29 (1.9%)                                  |
| 2009/10            | 22 (2.5%)                                  |
| 2010/11            | 26 (1.4%)                                  |
| 2011/12            | 52 (3.4%)                                  |
| 2012/13            | 31 (2.5%)                                  |
| 2013/14            | 29 (2.5%)                                  |
| 2014/15            | 32 (2.7%)                                  |
| 2015/16            | 35 (3.2%)                                  |
| 2016/17            | 31 (3.7%)                                  |
| 2017/18            | 34 (3.9%)                                  |
| 2018/19            | 33 (4.5%)                                  |

Abbreviations: NDNS, National Diet and Nutrition Survey

**Table 3. Per consumer trends (g/day (SE)) by meat category in NDNS Rolling Programme (2008/09-2018/19)**

|                        | 2008/09     | 2009/10     | 2010/11     | 2011/12    | 2012/13    | 2013/14     | 2014/15     | 2015/16     | 2016/17     | 2017/18    | 2018/19    | P trend |
|------------------------|-------------|-------------|-------------|------------|------------|-------------|-------------|-------------|-------------|------------|------------|---------|
| Total meat             | 107.5 (2.2) | 102.1 (3.4) | 104.2 (2.5) | 99.4 (2.1) | 98.9 (2.3) | 99.0 (2.2)  | 104.7 (2.9) | 98.6 (2.2)  | 100.0 (2.8) | 93.7 (2.4) | 92.3 (2.9) | <0.001  |
| Total red meat         | 46.5 (1.6)  | 41.4 (1.5)  | 43.1 (1.7)  | 40.1 (1.4) | 40.8 (1.7) | 38.0 (1.5)  | 41.0 (1.7)  | 38.5 (1.3)  | 40.8 (1.8)  | 36.4 (1.5) | 34.7 (1.5) | <0.001  |
| Total white meat       | 42.7 (1.5)  | 45.2 (3.2)  | 46.7 (1.9)  | 43.6 (1.4) | 42.5 (1.3) | 44.1 (1.7)  | 50.8 (2.1)  | 49.9 (1.8)  | 48.7 (2.10) | 45.1 (1.8) | 45.7 (2.0) | 0.052   |
| Total processed meat   | 41.6 (1.5)  | 40.7 (1.8)  | 43.3 (1.8)  | 38.9 (1.2) | 38.4 (1.3) | 41.4 (1.7)  | 38.7 (1.7)  | 35.9 (1.1)  | 35.0 (1.3)  | 34.1 (1.4) | 36.1 (1.9) | <0.001  |
| Total fish             | 34.6 (1.5)  | 33.9 (1.3)  | 33.8 (1.7)  | 33.7 (1.6) | 31.7 (1.4) | 36.1 (1.8)  | 33.5 (2.1)  | 31.5 (1.4)  | 31.6 (1.3)  | 35.8 (1.9) | 34.4 (1.5) | 0.789   |
| Beef                   | 30.7 (1.2)  | 29.8 (1.3)  | 30.8 (1.3)  | 28.3 (1.4) | 29.2 (1.8) | 25.0 (1.1)  | 29.1 (1.3)  | 27.6 (1.2)  | 29.3 (1.5)  | 25.5 (1.2) | 25.0 (1.4) | <0.001  |
| Lamb                   | 32.0 (1.8)  | 28.4 (1.7)  | 40.3 (3.4)  | 32.4 (2.9) | 32.2 (1.9) | 34.3 (2.4)  | 32.4 (3.5)  | 26.6 (2.0)  | 31.0 (2.5)  | 29.5 (2.4) | 32.3 (3.0) | 0.226   |
| Pork                   | 31.0 (1.7)  | 26.0 (2.1)  | 31.7 (2.4)  | 28.3 (1.6) | 28.5 (2.0) | 26.0 (2.2)  | 26.5 (1.6)  | 25.8 (2.1)  | 27.3 (2.4)  | 22.9 (1.7) | 24.5 (1.9) | 0.002   |
| Other red meat & offal | 17.1 (2.2)  | 12.0 (1.5)  | 16.5 (1.7)  | 9.1 (1.3)  | 12.3 (1.1) | 14.1 (1.9)  | 13.2 (2.0)  | 13.1 (21.7) | 11.0 (2.7)  | 12.4 (2.3) | 13.7 (2.2) | 0.221   |
| Poultry                | 42.1 (1.5)  | 45.0 (3.2)  | 46.6 (1.9)  | 43.2 (1.3) | 41.9 (1.3) | 43.6 (1.7)  | 49.9 (2.0)  | 49.6 (1.8)  | 48.4 (2.1)  | 45.1 (1.8) | 44.9 (2.1) | 0.046   |
| Game birds             | 18.1 (3.4)  | 21.3 (3.3)  | 22.0 (4.2)  | 17.1 (2.6) | 23.0 (3.8) | 31.2 (13.1) | 31.2 (8.4)  | 14.8 (3.1)  | 16.6 (2.5)  | 17.4 (2.6) | 18.3 (2.7) | 0.686   |
| Processed red meat     | 23.3 (1.1)  | 24.3 (1.6)  | 24.5 (1.1)  | 22.9 (0.9) | 22.5 (1.0) | 24.8 (1.2)  | 23.5 (1.0)  | 23.2 (0.9)  | 22.1 (1.0)  | 21.4 (1.0) | 21.2 (1.0) | 0.042   |
| Burgers                | 21.1 (1.7)  | 23.7 (1.2)  | 24.6 (1.6)  | 23.1 (1.2) | 22.6 (1.3) | 25.7 (1.6)  | 22.8 (1.1)  | 21.9 (1.4)  | 22.3 (1.6)  | 18.8 (1.5) | 25.6 (2.4) | 0.924   |
| Sausages               | 33.5 (1.6)  | 30.9 (1.4)  | 35.2 (1.5)  | 30.5 (1.2) | 29.6 (1.1) | 29.3 (1.4)  | 28.2 (1.5)  | 26.4 (1.0)  | 26.1 (1.3)  | 25.4 (1.2) | 26.7 (1.5) | <0.001  |
| Processed poultry      | 7.9 (1.2)   | 9.4 (2.9)   | 6.3 (0.9)   | 4.7 (0.9)  | 17.3 (3.5) | 5.3 (0.7)   | 2.6 (1.1)   | 8.9 (2.3)   | 3.1 (0.6)   | 6.7 (1.8)  | 3.4 (0.3)  | 0.094   |
| White fish             | 24.9 (1.3)  | 24.0 (0.9)  | 26.4 (1.4)  | 24.1 (1.2) | 25.1 (1.3) | 25.8 (1.9)  | 23.7 (1.4)  | 22.5 (1.1)  | 21.2 (1.0)  | 26.3 (2.4) | 25.0 (1.7) | 0.455   |
| Oily fish              | 30.9 (1.8)  | 31.7 (1.8)  | 26.3 (1.7)  | 31.9 (1.9) | 27.7 (1.8) | 33.4 (2.5)  | 29.6 (3.4)  | 25.7 (1.5)  | 27.6 (1.5)  | 29.6 (2.0) | 26.6 (1.9) | 0.061   |
| Canned tuna            | 19.4 (2.0)  | 15.7 (0.8)  | 15.4 (2.0)  | 17.4 (1.0) | 14.2 (1.4) | 16.7 (1.5)  | 17.9 (1.9)  | 16.6 (1.1)  | 17.4 (1.6)  | 18.8 (1.7) | 18.3 (1.6) | 0.391   |
| Shellfish              | 16.5 (1.5)  | 15.3 (1.5)  | 18.5 (2.4)  | 17.4 (2.0) | 14.7 (1.3) | 15.0 (1.4)  | 14.3 (1.8)  | 13.9 (1.4)  | 16.20 (1.9) | 14.4 (2.0) | 14.2 (1.2) | 0.103   |

Abbreviations: NDNS, National Diet and Nutrition Survey; SE, Standard Error

**Table 4. Per consumer meat intake differences (% of food energy) with demographic groups in NDNS Rolling Programme (2008/09-2018/19)**

|                                      | <b>Beta</b> | <b>95% CI</b> |       | <b>P Value</b> | <b>P Interaction*</b> |
|--------------------------------------|-------------|---------------|-------|----------------|-----------------------|
| <b>Gender</b>                        | -0.76       | -2.01         | 0.49  | 0.232          | 0.131                 |
| <b>Birth Cohort</b>                  |             |               |       |                | <0.001                |
| 1960-1979                            | 3.40        | 1.56          | 5.23  | <0.001         |                       |
| 1980-1999                            | 3.63        | 1.67          | 5.59  | <0.001         |                       |
| >1999                                | -3.14       | -4.52         | -1.76 | <0.001         |                       |
| <b>Ethnicity</b>                     |             |               |       |                | <0.001                |
| Black or Black British               | -2.37       | -10.24        | 5.50  | 0.554          |                       |
| Asian or Asian British               | -5.30       | -9.42         | -1.18 | 0.012          |                       |
| Other                                | -1.76       | -4.95         | 1.43  | 0.279          |                       |
| <b>Eqv household income tertiles</b> |             |               |       |                | 0.470                 |
| Middle tertile                       | 0.91        | -0.73         | 2.55  | 0.275          |                       |
| Highest tertile                      | -0.46       | -2.02         | 1.10  | 0.566          |                       |

Abbreviations: NDNS, National Diet and Nutrition Survey; Eqv, Equivalised; CI, confidence interval  
 Estimates from multivariate linear regression model. Each coefficient shows the difference in meat intake as a percentage of food energy compared with the reference category while adjusting for all other predictors of meat intake.

Reference categories are: men, birth cohort <1960, white ethnicity, equivalised household income lowest tertile.

\*P joint interaction of each covariate with year, Wald test, P<0.05 to denote statistical significance.

**Table 5. Daily environmental emissions/uses per capita by meat type in NDNS Rolling Programme (2008/09-2018/19)**

|                                                      | 2008/09         | 2009/10         | 2010/11         | 2011/12         | 2012/13         | 2013/14         |
|------------------------------------------------------|-----------------|-----------------|-----------------|-----------------|-----------------|-----------------|
| <b>Land Use (m<sup>2</sup>/g)</b>                    |                 |                 |                 |                 |                 |                 |
| Beef                                                 | 6.2 (0.29)      | 6.1 (0.33)      | 5.9 (0.32)      | 5.5 (0.35)      | 5.6 (0.45)      | 4.8 (0.29)      |
| Lamb                                                 | 2.7 (0.26)      | 1.9 (0.22)      | 2.4 (0.36)      | 1.7 (0.27)      | 2.1 (0.25)      | 2.0 (0.26)      |
| Pork                                                 | 0.1 (0.01)      | 0.1 (0.01)      | 0.1 (0.01)      | 0.1 (0.01)      | 0.1 (0.01)      | 0.1 (0.01)      |
| Poultry                                              | 0.4 (0.02)      | 0.4 (0.03)      | 0.4 (0.02)      | 0.4 (0.02)      | 0.4 (0.01)      | 0.4 (0.02)      |
| Total                                                | 9.4 (0.33)      | 8.5 (0.41)      | 8.8 (0.44)      | 7.8 (0.41)      | 8.3 (0.47)      | 7.4 (0.35)      |
| <b>GHG emissions (kg CO<sub>2</sub>eq/g)</b>         |                 |                 |                 |                 |                 |                 |
| Beef                                                 | 1.9 (0.09)      | 1.9 (0.10)      | 1.8 (0.10)      | 1.7 (0.11)      | 1.7 (0.14)      | 1.5 (0.09)      |
| Lamb                                                 | 0.3 (0.03)      | 0.2 (0.03)      | 0.3 (0.04)      | 0.2 (0.03)      | 0.2 (0.03)      | 0.2 (0.03)      |
| Pork                                                 | 0.1 (0.01)      | 0.1 (0.01)      | 0.1 (0.01)      | 0.1 (0.01)      | 0.1 (0.01)      | 0.1 (0.01)      |
| Poultry                                              | 0.3 (0.01)      | 0.3 (0.02)      | 0.3 (0.02)      | 0.3 (0.01)      | 0.3 (0.01)      | 0.3 (0.02)      |
| Total                                                | 2.6 (0.09)      | 2.5 (0.11)      | 2.5 (0.10)      | 2.3 (0.11)      | 2.3 (0.13)      | 2.1 (0.09)      |
| <b>Acidifying Emissions (g SO<sub>2</sub>eq/g)</b>   |                 |                 |                 |                 |                 |                 |
| Beef                                                 | 6.0 (0.28)      | 5.9 (0.33)      | 5.8 (0.31)      | 5.4 (0.34)      | 5.5 (0.44)      | 4.7 (0.28)      |
| Lamb                                                 | 1.0 (0.10)      | 0.7 (0.08)      | 0.9 (0.13)      | 0.7 (0.10)      | 0.8 (0.10)      | 0.8 (0.10)      |
| Pork                                                 | 1.2 (0.10)      | 0.8 (0.09)      | 0.8 (0.08)      | 1.1 (0.10)      | 1.1 (0.12)      | 0.9 (0.11)      |
| Poultry                                              | 3.3 (0.13)      | 3.4 (0.25)      | 3.6 (0.17)      | 3.3 (0.13)      | 3.3 (0.12)      | 3.3 (0.16)      |
| Total                                                | 11.5 (0.30)     | 10.8 (0.43)     | 11.0 (0.37)     | 10.5 (0.36)     | 10.7 (0.45)     | 9.7 (0.30)      |
| <b>Eutrophying Emissions (g PO<sub>4</sub>-eq/g)</b> |                 |                 |                 |                 |                 |                 |
| Beef                                                 | 5.7 (0.27)      | 5.6 (0.31)      | 5.5 (0.30)      | 5.1 (0.32)      | 5.2 (0.41)      | 4.5 (0.27)      |
| Lamb                                                 | 0.7 (0.07)      | 0.5 (0.06)      | 0.6 (0.09)      | 0.5 (0.07)      | 0.6 (0.07)      | 0.5 (0.07)      |
| Pork                                                 | 0.6 (0.05)      | 0.4 (0.05)      | 0.4 (0.05)      | 0.6 (0.05)      | 0.6 (0.06)      | 0.5 (0.06)      |
| Poultry                                              | 1.6 (0.06)      | 1.6 (0.12)      | 1.7 (0.08)      | 1.6 (0.06)      | 1.6 (0.06)      | 1.6 (0.08)      |
| Total                                                | 8.6 (0.26)      | 8.1 (0.34)      | 8.2 (0.31)      | 7.7 (0.32)      | 7.9 (0.41)      | 7.1 (0.26)      |
| <b>Freshwater Withdrawals (L/g)</b>                  |                 |                 |                 |                 |                 |                 |
| Beef                                                 | 27.5 (1.28)     | 27.0 (1.45)     | 26.4 (1.42)     | 24.7 (1.55)     | 24.9 (1.99)     | 21.6 (1.30)     |
| Lamb                                                 | 13.1 (1.25)     | 9.3 (1.07)      | 11.5 (1.74)     | 8.5 (1.34)      | 10.5 (1.24)     | 10.0 (1.26)     |
| Pork                                                 | 15.0 (1.21)     | 10.4 (1.12)     | 9.6 (1.06)      | 13.7 (1.24)     | 13.7 (1.46)     | 11.2 (1.34)     |
| Poultry                                              | 21.1 (0.85)     | 21.6 (1.62)     | 23.0 (1.13)     | 21.4 (0.83)     | 21.2 (0.79)     | 21.4 (1.03)     |
| Total                                                | 76.7 (2.01)     | 68.3 (2.57)     | 70.5 (2.55)     | 68.3 (2.27)     | 70.3 (2.51)     | 64.1 (2.04)     |
| <b>Stress-Weighted Water Use (L/g)</b>               |                 |                 |                 |                 |                 |                 |
| Beef                                                 | 658.5 (30.60)   | 646.7 (35.60)   | 630.8 (34.08)   | 590.4 (37.09)   | 595.8 (47.53)   | 516.0 (31.02)   |
| Lamb                                                 | 1028.3 (98.20)  | 728.6 (83.99)   | 906.7 (136.84)  | 669.5 (105.19)  | 824.1 (97.53)   | 785.0 (98.90)   |
| Pork                                                 | 559.9 (45.21)   | 386.4 (41.22)   | 358.7 (39.54)   | 510.8 (46.06)   | 510.4 (54.44)   | 417.0 (50.06)   |
| Poultry                                              | 453.3 (18.33)   | 464.8 (34.87)   | 493.8 (24.17)   | 459.1 (17.93)   | 455.8 (16.97)   | 459.3 (22.04)   |
| Total                                                | 2700.1 (108.50) | 2226.5 (102.82) | 2390.0 (142.05) | 2229.8 (112.04) | 2386.2 (110.47) | 2177.3 (103.48) |

**Table 5. Cont. Daily environmental emissions/uses per capita by meat type in NDNS Rolling Programme (2008/09-2018/19)**

|                                                      | 2014/15         | 2015/16        | 2016/17         | 2017/18         | 2018/19        | P trend |
|------------------------------------------------------|-----------------|----------------|-----------------|-----------------|----------------|---------|
| <b>Land Use (m<sup>2</sup>/g)</b>                    |                 |                |                 |                 |                |         |
| Beef                                                 | 5.5 (0.32)      | 5.1 (0.32)     | 5.4 (0.37)      | 4.7 (0.28)      | 4.3 (0.30)     | <0.001  |
| Lamb                                                 | 1.9 (0.30)      | 1.6 (0.21)     | 1.9 (0.31)      | 1.7 (0.23)      | 1.2 (0.17)     | <0.001  |
| Pork                                                 | 0.1 (0.01)      | 0.1 (0.01)     | 0.1 (0.01)      | 0.1 (0.01)      | 0.1 (0.01)     | 0.080   |
| Poultry                                              | 0.5 (0.02)      | 0.5 (0.02)     | 0.5 (0.02)      | 0.4 (0.02)      | 0.4 (0.02)     | 0.002   |
| Total                                                | 7.9 (0.41)      | 7.3 (0.33)     | 7.9 (0.52)      | 7.0 (0.34)      | 6.1 (0.35)     | <0.001  |
| <b>GHG emissions (kg CO<sub>2</sub>eq/g)</b>         |                 |                |                 |                 |                |         |
| Beef                                                 | 1.7 (0.10)      | 1.6 (0.10)     | 1.7 (0.11)      | 1.4 (0.09)      | 1.3 (0.09)     | <0.001  |
| Lamb                                                 | 0.2 (0.03)      | 0.2 (0.02)     | 0.2 (0.03)      | 0.2 (0.03)      | 0.1 (0.02)     | <0.001  |
| Pork                                                 | 0.1 (0.01)      | 0.1 (0.01)     | 0.1 (0.01)      | 0.1 (0.01)      | 0.1 (0.01)     | 0.008   |
| Poultry                                              | 0.4 (0.02)      | 0.4 (0.02)     | 0.4 (0.02)      | 0.4 (0.02)      | 0.3 (0.02)     | 0.002   |
| Total                                                | 2.3 (0.10)      | 2.2 (0.10)     | 2.3 (0.13)      | 2.1 (0.09)      | 1.9 (0.09)     | <0.001  |
| <b>Acidifying Emissions (g SO<sub>2</sub>eq/g)</b>   |                 |                |                 |                 |                |         |
| Beef                                                 | 5.3 (0.32)      | 5.0 (0.31)     | 5.3 (0.36)      | 4.6 (0.28)      | 4.2 (0.30)     | <0.001  |
| Lamb                                                 | 0.7 (0.11)      | 0.6 (0.08)     | 0.7 (0.12)      | 0.6 (0.09)      | 0.5 (0.07)     | <0.001  |
| Pork                                                 | 1.0 (0.09)      | 1.0 (0.11)     | 0.9 (0.11)      | 0.8 (0.08)      | 0.8 (0.09)     | 0.080   |
| Poultry                                              | 4.0 (0.19)      | 3.9 (0.18)     | 3.9 (0.19)      | 3.7 (0.18)      | 3.6 (0.20)     | 0.002   |
| Total                                                | 11.0 (0.39)     | 10.5 (0.36)    | 10.8 (0.48)     | 9.7 (0.32)      | 9.1 (0.35)     | <0.001  |
| <b>Eutrophying Emissions (g PO<sub>4</sub>-eq/g)</b> |                 |                |                 |                 |                |         |
| Beef                                                 | 5.1 (0.30)      | 4.7 (0.30)     | 5.0 (0.34)      | 4.4 (0.26)      | 4.0 (0.28)     | <0.001  |
| Lamb                                                 | 0.5 (0.08)      | 0.4 (0.05)     | 0.5 (0.08)      | 0.4 (0.06)      | 0.3 (0.05)     | <0.001  |
| Pork                                                 | 0.5 (0.05)      | 0.5 (0.06)     | 0.5 (0.06)      | 0.4 (0.04)      | 0.4 (0.05)     | 0.080   |
| Poultry                                              | 1.9 (0.09)      | 1.9 (0.09)     | 1.8 (0.09)      | 1.7 (0.08)      | 1.7 (0.09)     | 0.002   |
| Total                                                | 8.0 (0.32)      | 7.5 (0.30)     | 7.9 (0.39)      | 7.0 (0.27)      | 6.5 (0.29)     | <0.001  |
| <b>Freshwater Withdrawals (L/g)</b>                  |                 |                |                 |                 |                |         |
| Beef                                                 | 24.3 (1.44)     | 22.7 (1.43)    | 24.2 (1.66)     | 21.1 (1.27)     | 19.3 (1.35)    | <0.001  |
| Lamb                                                 | 9.1 (1.46)      | 7.8 (1.02)     | 9.3 (1.52)      | 8.3 (1.14)      | 6.0 (0.85)     | <0.001  |
| Pork                                                 | 12.5 (1.18)     | 12.1 (1.34)    | 11.8 (1.44)     | 10.0 (1.02)     | 10.4 (1.12)    | 0.080   |
| Poultry                                              | 25.7 (1.19)     | 25.3 (1.13)    | 24.9 (1.23)     | 23.6 (1.14)     | 23.3 (1.27)    | 0.002   |
| Total                                                | 71.6 (2.66)     | 68.0 (2.29)    | 70.1 (3.24)     | 63.0 (2.10)     | 58.9 (2.34)    | <0.001  |
| <b>Stress-Weighted Water Use (L/g)</b>               |                 |                |                 |                 |                |         |
| Beef                                                 | 582.5 (34.56)   | 544.5 (34.32)  | 579.2 (39.69)   | 504.9 (30.31)   | 461.2 (32.23)  | <0.001  |
| Lamb                                                 | 715.8 (114.60)  | 616.5 (79.92)  | 734.3 (119.92)  | 645.1 (89.76)   | 470.5 (66.59)  | <0.001  |
| Pork                                                 | 464.4 (43.96)   | 451.0 (49.78)  | 437.72 (53.58)  | 373.2 (37.95)   | 386.8 (41.76)  | 0.080   |
| Poultry                                              | 552.0 (25.63)   | 543.2 (24.31)  | 534.2 (26.46)   | 507.0 (24.53)   | 500.4 (27.34)  | 0.002   |
| Total                                                | 2314.8 (129.48) | 2155.2 (94.44) | 2285.4 (149.80) | 2039.1 (102.15) | 1818.9 (94.64) | <0.001  |

Abbreviations: NDNS, National Diet and Nutrition Survey. Standard errors are denoted in brackets.

**Figure 1. Proportion of adult consumers ( $\geq 19$  years) meeting SACN's recommendation to limit red and processed meat consumption to 70g a day, n=7,243.**

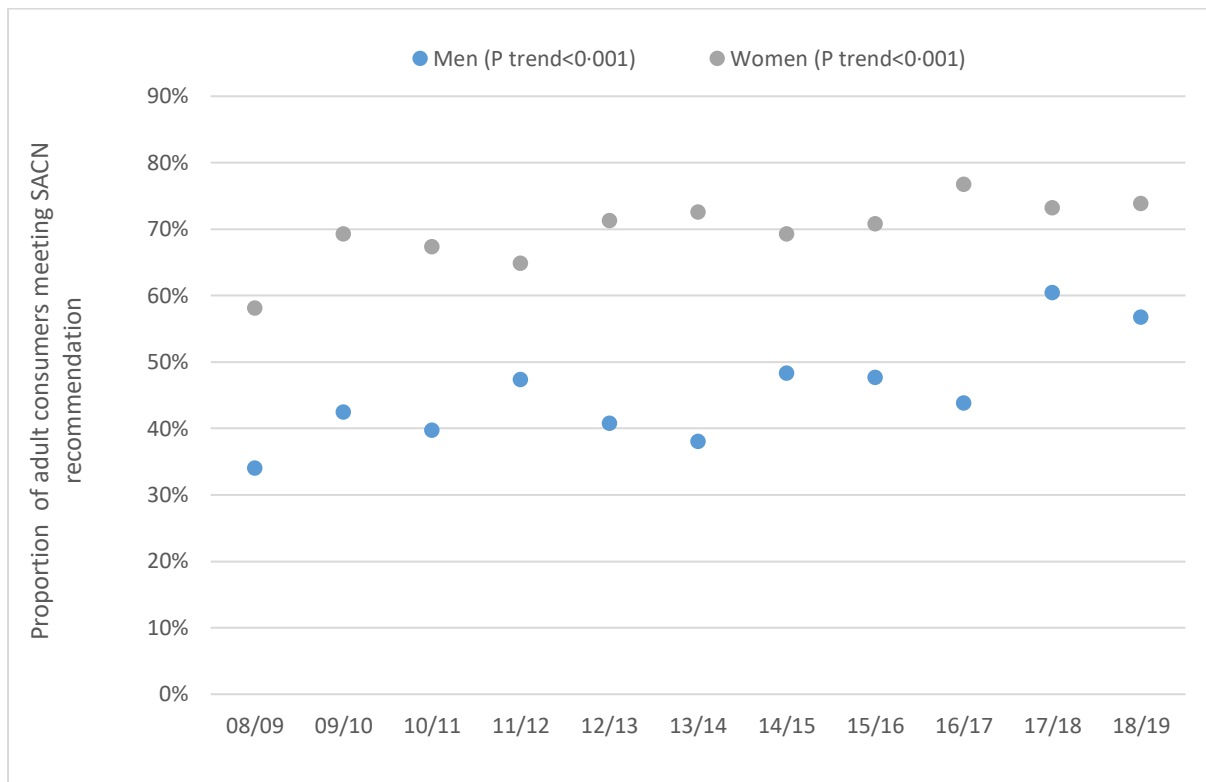

Abbreviations: SACN, Scientific Advisory Committee on Nutrition
